# Supplementary material
Source: publisher figshare collection journal article supplement (https://sage.figshare.com/ndownloader/files/13329878)
Supplement: Supplementary file 1 [file 13329878]

| **Supplemental Table 5.** Effect of diet-induced obesity on urinalysis parameters in 32 week old rats - Group incidence and severity. | | | | |
| --- | --- | --- | --- | --- |
| Sex | Females |  | Males | |
| Diet  Number of animals | CD  (*n*=24) | HFD (*n*=22) | CD  (*n*=24) | HFD (*n*=24) |
| **Colour** |  |  |  |  |
| Light yellow | 14 (58%) | 13 (59%) | 6 (25%) | 13 (54%) |
| Yellow | 8 (33%) | 9 (41%) | 12 (50%) | 9 (38%) |
| Dark yellow | 2 (8%) | 0 (0%) | 4 (17%) | 2 (8%) |
| Brown | 0 (0%) | 0 (0%) | 2 (8%) | 0 (0%) |
| ***P*-value** | **0.59** |  | **0.02** |  |
| **Turbidity** |  |  |  |  |
| Clear | 16 (67%) | 22 (100%) | 9 (38%) | 21 (88%) |
| Light turbid | 6 (25%) | 0 (0%) | 12 (50%) | 3 (13%) |
| Turbid | 1 (4%) | 0 (0%) | 2 (8%) | 0 (0%) |
| Very turbid | 1 (4%) | 0 (0%) | 1 (4%) | 0 (0%) |
| ***P*-value** | **0.0092** |  | **0.0006** |  |
| **Erythrocytes** |  |  |  |  |
| No trace | 18 (75%) | 15 (68%) | 15 (63%) | 12 (50%) |
| Trace | 4 (17%) | 4 (18%) | 6 (25%) | 10 (42%) |
| Slight | 1 (4%) | 2 (9%) | 2 (8%) | 2 (8%) |
| Moderate | 1 (4%) | 1 (5%) | 1 (4%) | 0 (0%) |
| Marked | 0 (0%) | 0 (0%) | 0 (0%) | 0 (0%) |
| ***P*-value** | **0.60** |  | **0.84** |  |
| **Leucocytes** |  |  |  |  |
| No trace | 19 (79%) | 20 (91%) | 19 (79%) | 20 (83%) |
| Trace | 3 (13%) | 2 (9%) | 4 (17%) | 4 (17%) |
| Slight | 0 (0%) | 0 (0%) | 1 (4%) | 0 (0%) |
| Moderate | 2 (8%) | 0 (0%) | 0 (0%) | 0 (0%) |
| ***P*-value** | **0.17** |  | **0.53** |  |
| **Epithelial cells** |  |  |  |  |
| No trace | 14 (58%) | 15 (68%) | 3 (13%) | 12 (50%) |
| Trace | 7 (29%) | 7 (32%) | 17 (71%) | 10 (42%) |
| Slight | 3 (13%) | 0 (0%) | 4 (17%) | 2 (8%) |
| ***P*-value** | **0.22** |  | **0.01** |  |
| **Crystals** |  |  |  |  |
| No trace | 0 (0%) | 1 (5%) | 0 (0%) | 0 (0%) |
| Trace | 6 (25%) | 11 (50%) | 0 (0%) | 3 (13%) |
| Slight | 7 (29%) | 9 (41%) | 4 (17%) | 16 (67%) |
| Moderate | 8 (33%) | 1 (5%) | 13 (54%) | 5 (21%) |
| Marked | 3 (13%) | 0 (0%) | 7 (29%) | 0 (0%) |
| ***P*-value** | **0.0018** |  | **<0.0001** |  |
| **Urates** |  |  |  |  |
| No trace | 5 (21%) | 8 (36%) | 3 (13%) | 7 (29%) |
| Trace | 3 (13%) | 9 (41%) | 4 (17%) | 7 (29%) |
| Slight | 3 (13%) | 5 (23%) | 11 (46%) | 10 (42%) |
| Moderate | 2 (8%) | 0 (0%) | 3 (13%) | 0 (0%) |
| Marked | 11 (46%) | 0 (0%) | 3 (13%) | 0 (0%) |
| ***P*-value** | **0.0004** |  | **0.0075** |  |
| **Bacteria** |  |  |  |  |
| Slight | 1 (4%) | 7 (32%) | 1 (4%) | 0 (0%) |
| Moderate | 17 (71%) | 15 (68%) | 20 (83%) | 22 (92%) |
| Marked | 6 (25%) | 0 (0%) | 3 (13%) | 2 (8%) |
| ***P*-value** | **0.0012** |  | **>0.9999** |  |

Microscopic examination of spun sediment at 40X magnification (unitless). Group incidence/severity data expressed as absolute and % values. *P-*values denote CD *vs.* HFD group comparison as determined by Chi Square Test for trend.
